# Supplementary material for: The synergistic extraction of heavy rare earth elements using EHEHP-type and BTMPP-type functional ionic liquids
Source: Royal Society of Chemistry journal article supplement (doi:10.1039/c5ra05884h), 2015-01-01
Supplement: c5ra05884h1.pdf [file c5ra05884h1.pdf]

## Supporting Information

### NMR spectra of the ABC-BILs

| ABC-BILs                    |                  | $\delta$                                   |                                               |
|-----------------------------|------------------|--------------------------------------------|-----------------------------------------------|
|                             |                  | $^1\text{H}$ NMR (CDCl <sub>3</sub> , ppm) | $^{13}\text{C}$ NMR (CDCl <sub>3</sub> , ppm) |
| [N <sub>4444</sub> ][EHEHP] | CH <sub>3</sub>  | 0.785–0.82(12H),                           | 10.32(4C),10.95(1C),13.60(1C),14.04(1C),14    |
|                             |                  | 0.956–0.987(12H)                           | .17(1C)                                       |
|                             | CH <sub>2</sub>  | 1.08–1.32(32H)                             | 19.65(4C),23.35(1C),24.19(1C),26.63(4C),28    |
|                             |                  |                                            | .76(1C),29.05(1C),30.13(1C),31.22(1C),31.9    |
|                             | PCH <sub>2</sub> | 1.03(2H)                                   | 6(1C), 33.89(1C)                              |
|                             | CH               | 1.62(2H)                                   | 23.10(1C)                                     |
|                             | NCH <sub>2</sub> | 3.31(8H)                                   | 34.92(1C),40.61(1C)                           |
| OCH <sub>2</sub>            | 3.63(2H)         | 58.63(4C)                                  |                                               |
| [N <sub>1888</sub> ][EHEHP] | CH <sub>3</sub>  | 0.83–0.89(21H)                             | 65.81(1C)                                     |
|                             | PCH <sub>2</sub> | 1.01(2H)                                   | 0.69(1C),10.27(1C),13.96(5C)                  |
|                             | CH <sub>2</sub>  | 1.16-1.26(4H),                             | 22.21(1C)                                     |
|                             |                  | 1.33–1.42(32H),                            | 22.33(3C),22.46(2C),23.06(3C),23.26(1C),26    |
|                             |                  | 1.45(10H), 1.72(6H)                        | .31(1C),28.94(3C),30.11(8C),31.51(1C),31.6    |
|                             | CH               | 1.55(1H),1.64(1H)                          | 8(1C),33.67(3C),                              |
|                             | NCH <sub>2</sub> | 3.27(6H)                                   | 34.79 (1C),40.59(1C)                          |
|                             | NCH <sub>3</sub> | 3.33(3H)                                   | 65.84 (3C)                                    |
| OCH <sub>2</sub>            | 3.49(2H)         | 48.96(1C)                                  |                                               |
| [N <sub>4444</sub> ][BTMPP] | CH <sub>3</sub>  | 0.873–0.916(12H),                          | 61.12 (1C)                                    |
|                             |                  | 0.998–1.013(24H)                           | 13.44 (4C),23.74(2C),                         |
|                             | CH <sub>2</sub>  | 1.09–1.14 (4H),                            | 30.06 (6C)                                    |
|                             |                  | 1.46 (8H), 1.96 (8H),                      | 19.42(4C),24.97(4C),53.98 (2C)                |
| CH                          | 1.66( 2H)        | 24.14(2C),                                 |                                               |

---

|                             |                  |                                    |                                                                 |
|-----------------------------|------------------|------------------------------------|-----------------------------------------------------------------|
|                             | C                |                                    | 25.4 (2C)                                                       |
|                             | NCH <sub>2</sub> | 3.37 (8H).                         | 58.32(4C)                                                       |
|                             | PCH <sub>2</sub> | 1.3 (4H)                           | 29.8 (2C)                                                       |
| [N <sub>1888</sub> ][BTMPP] | CH <sub>3</sub>  | 0.85-0.88(9H),<br>0.89-0.93(24H)   | 13.93(3C),22.49(2C)30.29(6C)                                    |
|                             | PCH <sub>2</sub> | 1.38 (4H)                          | 29.1(2PC)                                                       |
|                             | CH <sub>2</sub>  | 1.067-1.13(4H),<br>1.18-1.34 (36H) | 24.37(3C),24.37(3C),28.95(3C),31.14(6C),31<br>.57(3C),54.07(2C) |
|                             | CH               | 1.53 (2H)                          | 22.29(2C)                                                       |
|                             | C                |                                    | 26.31 (2C)                                                      |
|                             | NCH <sub>2</sub> | 3.29 (6H)                          | 61.11 (3C)                                                      |
|                             | NCH <sub>3</sub> | 3.3 (3H)                           | 43.18(1C),                                                      |

---
